# Supplementary material for: Disability among Women and Men Who Married in Childhood: Evidence from Cross-Sectional Nationally Representative Surveys Undertaken in 37 Low- and Middle-Income Countries
Source: MDPI journal article supplement (doi:10.3390/ijerph20010088), 2022-12-21
Supplement: s1 [file s1]

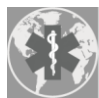

**Supplementary Table S1.** Prevalence of Disability Stratified by Participant Age, Household Wealth, Highest Level of Education and Country Economic Classification Group.

|                                          | Women                    |                                  | Men                      |                                  |
|------------------------------------------|--------------------------|----------------------------------|--------------------------|----------------------------------|
|                                          | Prevalence of disability | Unadjusted prevalence rate ratio | Prevalence of disability | Unadjusted prevalence rate ratio |
| Age                                      |                          |                                  |                          |                                  |
| under 22                                 | 9.0%                     | 1.0 (reference)                  | 8.0%                     | 1.0 (reference)                  |
| Nwomen = 67,884, Nmen=16,798             | (8.3-9.9)                |                                  | (7.0-9.0)                |                                  |
| 22-25                                    | 8.7%                     | 1.02                             | 7.6%                     | 0.92*                            |
| Nwomen = 65,699, Nmen=13,585             | (8.0-9.4)                | (0.99-1.06)                      | (6.7-8.6)                | (0.85-1.00)                      |
| 26-29                                    | 10.2%                    | 1.17***                          | 8.1%                     | 0.99 (0.91-1.12)                 |
| Nwomen = 60,907, Nmen=12,409             | (9.5-11.0)               | (1.13-1.21)                      | (7.3-9.0)                |                                  |
| 30-33                                    | 11.6%                    | 1.37***                          | 8.2%                     | 1.03                             |
| Nwomen = 58,328, Nmen=12,518             | (10.7-12.6)              | (1.32-1.42)                      | (7.3-9.3)                | (0.95-1.12)                      |
| 34-37                                    | 14.7%                    | 1.71***                          | 9.4%                     | 1.20***                          |
| Nwomen = 52,918, Nmen=11,541             | (13.6-15.8)              | (1.65-1.77)                      | (8.3-10.7)               | (1.10-1.30)                      |
| 38-41                                    | 19.4%                    | 2.27***                          | 11.4%                    | 1.43***                          |
| Nwomen = 45,957, Nmen=10,341             | (18.2-20.7)              | (2.19-2.35)                      | (10.1-12.8)              | (1.32-1.55)                      |
| 42-45                                    | 25.3%                    | 3.01***                          | 14.5%                    | 1.88***                          |
| Nwomen = 39,378, Nmen=9,251              | (24.9-26.7)              | (2.91-3.11)                      | 12.7-16.4                | (1.74-2.02)                      |
| 46-49                                    | 31.4%                    | 3.76***                          | 19.8%                    | 2.53***                          |
| Nwomen = 32,094, Nmen=7,825              | (29.9-33.2)              | (3.64-3.88)                      | (17.7-22.1)              | (2.34-2.72)                      |
| Within Country Household Wealth Quintile |                          |                                  |                          |                                  |
| Richest                                  | 12.2%                    | 1.0 (reference)                  | 7.8%                     | 1.0 (reference)                  |
| Nwomen = 78,424, Nmen=17,787             | (11.1-13.4)              |                                  | (6.9-8.8)                |                                  |
| 4                                        | 14.0%                    | 1.10***                          | 9.6%                     | 1.11**                           |
| Nwomen = 81,897, Nmen=18,210             | (13.0-15.1)              | (1.07-1.13)                      | (8.6-10.7)               | (1.04-1.19)                      |
| 3                                        | 14.9%                    | 1.17***                          | 10.9%                    | 1.24***                          |
| Nwomen = 84,028, Nmen=18,436             | (13.8-16.0)              | (1.14-1.20)                      | (9.8-12.2)               | (1.16-1.33)                      |
| 2                                        | 15.8%                    | 1.22***                          | 11.7%                    | 1.32***                          |
| Nwomen = 86,1879, Nmen=19,735            | (14.6-17.1)              | (1.19-1.25)                      | (10.3-13.2)              | (1.24-1.42)                      |
| Poorest                                  | 17.1%                    | 1.33***                          | 13.7%                    | 1.52***                          |
| Nwomen = 92,637, Nmen=21,243             | (15.7-18.6)              | (1.29-1.36)                      | (12.3-15.3)              | (1.42-1.62)                      |
| Highest Level of Education               |                          |                                  |                          |                                  |
| Secondary                                | 12.2%                    | 1.0 (reference)                  | 9.6%                     | 1.0 (reference)                  |
| Nwomen = 235,886, Nmen=59,673            | (11.4-13.0)              |                                  | (8.8-10.6)               |                                  |
| Primary                                  | 18.6%                    | 1.57***                          | 12.6%                    | 1.57***                          |
| Nwomen = 110,858, Nmen=23,444            | (17.4-19.9)              | (1.53-1.60)                      | (11.7-13.5)              | (1.53-1.60)                      |
| Pre-primary/None                         | 17.5%                    | 1.74***                          | 11.6%                    | 1.71***                          |
| Nwomen = 76,370, Nmen=12,247             | (14.9-20.5)              | (1.70-1.78)                      | (8.9-15.0)               | (1.60-1.83)                      |
| Country Economic Classification Group    |                          |                                  |                          |                                  |
| Upper-middle income                      | 15.0%                    | n/a                              | 9.6%                     | n/a                              |
| Nwomen = 105,418, Nmen=16,451            | (13.9-16.1)              |                                  | (8.8-10.4)               |                                  |
| Lower-middle income                      | 14.9%                    | n/a                              | 12.8%                    | n/a                              |
|                                          | (13.6-16.3)              |                                  | (11.6-14.0))             |                                  |

|                                                |                      |     |                    |     |
|------------------------------------------------|----------------------|-----|--------------------|-----|
| Nwomen = 191,938,<br>Nmen=38,177               |                      |     |                    |     |
| Low income<br>Nwomen = 125,809,<br>Nmen=40,783 | 14.1%<br>(11.9-16.6) | n/a | 8.8%<br>(7.3-10.6) | n/a |

Note: \* p<0.05, \*\* p<0.01, \*\*\* p<0.001.

**Supplementary Table S2.** Prevalence of Child Marriage Stratified by Participant Age, Household Wealth, Highest Level of Education and Country Economic Classification Group.

| Women                                    | Child Marriage Under 18  |                                  | Child Marriage Under 16  |                                  |
|------------------------------------------|--------------------------|----------------------------------|--------------------------|----------------------------------|
|                                          | Prevalence of disability | Unadjusted prevalence rate ratio | Prevalence of disability | Unadjusted prevalence rate ratio |
| Age                                      |                          |                                  |                          |                                  |
| under 22<br>N=67,878                     | 28.6%<br>(27.6-29.5)     | 1.0 (reference)                  | 13.3%<br>(12.8-13.7)     | 1.0 (reference)                  |
| 22-25<br>N=65,696                        | 30.9%<br>(29.5-32.4)     | 1.09***<br>(1.07-1.11)           | 14.9%<br>(14.4-15.5)     | 1.14***<br>(1.11-1.18)           |
| 26-29<br>N=60,906                        | 31.0%<br>(29.6-32.4)     | 1.10***<br>(1.08-1.13)           | 15.6%<br>(15.1-16.2)     | 1.21***<br>(1.18-1.25)           |
| 30-33<br>N=58,327                        | 32.3%<br>(30.8-33.8)     | 1.15***<br>(1.13-1.17)           | 17.4%<br>(16.6-18.2)     | 1.36***<br>(1.32-1.39)           |
| 34-37<br>N=52,916                        | 32.8%<br>(31.0-34.6)     | 1.17***<br>(1.15-1.20)           | 16.5%<br>(15.6-17.4)     | 1.29***<br>(1.26-1.33)           |
| 38-41<br>N=45,954                        | 31.4%<br>(29.7-33.0)     | 1.16***<br>(1.13-1.18)           | 16.5%<br>(15.6-17.5)     | 1.33***<br>(1.30-1.38)           |
| 42-45<br>N=39,375                        | 30.4%<br>(28.7-32.2)     | 1.19***<br>(1.16-1.22)           | 15.5%<br>(14.4-16.6)     | 1.36***<br>(1.32-1.40)           |
| 46-49<br>N=32,093                        | 28.4%<br>(26.5-30.4)     | 1.16***<br>(1.13-1.18)           | 14.3%<br>(13.0-15.6)     | 1.31***<br>(1.27-1.36)           |
| Within Country Household Wealth Quintile |                          |                                  |                          |                                  |
| Richest<br>N=78,422                      | 20.8%<br>(19.5-22.2)     | 1.0 (reference)                  | 9.8%<br>(9.2-10.4)       | 1.0 (reference)                  |
| 4<br>N=81,894                            | 29.0%<br>(27.7-30.4)     | 1.38***<br>(1.35-1.41)           | 14.1%<br>(13.4-14.8)     | 1.44***<br>(1.40-1.48)           |
| 3<br>N=84,024                            | 32.9%<br>(31.6-34.4)     | 1.56***<br>(1.53-1.59)           | 16.7%<br>(16.0-17.5)     | 1.68***<br>(1.63-1.72)           |
| 2<br>N=86,174                            | 36.0%<br>(34.4-37.6)     | 1.69***<br>(1.66-1.72)           | 18.6%<br>(17.8-19.5)     | 1.85***<br>(1.80-1.90)           |
| Poorest<br>N=92,631                      | 37.4%<br>(35.6-39.2)     | 1.77***<br>(1.74-1.80)           | 19.4%<br>(18.6-20.3)     | 1.95***<br>(1.91-2.01)           |
| Highest Level of Education               |                          |                                  |                          |                                  |
| Secondary<br>N=235,876                   | 19.9%<br>(19.0-20.8)     | 1.0 (reference)                  | 8.2%<br>(7.7-8.7)        | 1.0 (reference)                  |
| Primary<br>N=110,850                     | 44.5%<br>(42.7-46.4)     | 1.88***<br>(1.85-1.91)           | 23.1%<br>(22.2-24.1)     | 2.29***<br>(2.25-2.34)           |
| Pre-primary/None<br>N=76,368             | 48.7%<br>(46.7-50.7)     | 1.92***<br>(1.89-1.95)           | 29.8%<br>(29.0-30.7)     | 2.49***<br>(2.44-2.55)           |
| Country Economic Classification Group    |                          |                                  |                          |                                  |
| Upper-middle income<br>N=105,411         | 22.2%<br>(21.1-23.3)     | n/a                              | 9.7%<br>(9.2-10.2)       | n/a                              |

|                                          |                       |                        |                      |                        |
|------------------------------------------|-----------------------|------------------------|----------------------|------------------------|
| Lower-middle income<br>N=191,926         | 30.4%<br>(27.0-34.1)  | n/a                    | 15.1%<br>(13.1-17.4) | n/a                    |
| Low income<br>N=125,808                  | 39.0%<br>(37.8-40.2)  | n/a                    | 21.2%<br>(20.7-21.7) | n/a                    |
| Men                                      |                       |                        |                      |                        |
| Age                                      |                       |                        |                      |                        |
| under 22<br>N=16,639                     | 5.3%<br>(4.6-6.2)     | 1.0 (reference)        | 1.7%<br>(1.3-2.3)    | 1.0 (reference)        |
| 22-25<br>N=13,463                        | 7.5%<br>(6.8-8.1)     | 1.34***<br>(1.23-1.46) | 3.0%<br>(2.6-3.5)    | 1.58***<br>(1.37-1.82) |
| 26-29<br>N=12,343                        | 8.0%<br>(7.4-8.7)     | 1.51***<br>(1.39-1.65) | 3.4%<br>(2.9-4.0)    | 2.08***<br>(1.80-2.39) |
| 30-33<br>N=12,468                        | 8.9%<br>(8.1-9.7)     | 1.73***<br>(1.59-1.88) | 4.4%<br>(3.8-5.0)    | 2.65***<br>(2.32-3.03) |
| 34-37<br>N=11,509                        | 9.4%<br>(8.6-10.2)    | 1.72***<br>(1.58-1.88) | 3.9%<br>(3.1-4.8)    | 2.19***<br>(1.91-2.52) |
| 38-41<br>N=10,309                        | 8.2%<br>(7.1-9.6)     | 1.51***<br>(1.38-1.65) | 3.7%<br>(2.9-4.8)    | 2.17***<br>(1.88-2.51) |
| 42-45<br>N=9,221                         | 7.9%<br>(7.0-8.8)     | 1.50***<br>(1.36-1.64) | 3.7%<br>(3.0-4.5)    | 2.18***<br>(1.88-2.52) |
| 46-49<br>N=7,795                         | 8.1%<br>(7.2-9.0)     | 1.58***<br>(1.43-1.74) | 3.7%<br>(2.9-4.6)    | 2.30***<br>(1.97-2.69) |
| Within Country Household Wealth Quintile |                       |                        |                      |                        |
| Richest<br>N=17,689                      | 4.6%<br>(4.2-5.0)     | 1.0 (reference)        | 2.0%<br>(1.8-2.3)    | 1.0 (reference)        |
| 4<br>N=18,119                            | 7.0%<br>(6.4-7.6)     | 1.59***<br>(1.45-1.73) | 2.8%<br>(2.4-3.2)    | 1.51***<br>(1.32-1.72) |
| 3<br>N=18,329                            | 8.6%<br>(7.9-9.3)     | 1.87***<br>(1.72-2.03) | 3.6%<br>(2.9-4.3)    | 1.90***<br>(1.67-2.16) |
| 2<br>N=19,628                            | 9.0%<br>(8.0-10.1)    | 2.05***<br>(1.89-2.22) | 3.9%<br>(3.2-4.9)    | 2.14***<br>(1.89-2.42) |
| Poorest<br>N=21,124                      | 10.8%<br>(9.5-12.2)   | 2.54***<br>(2.34-2.74) | 4.7%<br>(3.6-6.1)    | 2.66***<br>(2.36-3.00) |
| Highest Level of Education               |                       |                        |                      |                        |
| Secondary<br>N=59,222                    | 5.6%<br>(5.3-6.0)     | 1.0 (reference)        | 2.2%<br>(2.0-2.4)    | 1.0 (reference)        |
| Primary<br>N=23,389                      | 11.4%<br>(10.6-12.3)) | 1.83***<br>(1.74-1.93) | 4.8%<br>(4.4-5.2)    | 1.92***<br>(1.76-2.08) |
| Pre-primary/None<br>N=12,232             | 13.1%<br>(10.2-16.6)  | 2.05***<br>(1.92-2.19) | 7.2%<br>(4.5-11.5)   | 2.55***<br>(2.32-2.81) |
| Country Economic Classification Group    |                       |                        |                      |                        |
| Upper-middle income<br>N=15,977          | 5.3%<br>(3.7-7.5)     | n/a                    | 1.8%<br>(1.3-2.6)    | n/a                    |
| Lower-middle income<br>N=38,159          | 7.6%<br>(6.5-8.9)     | n/a                    | 2.8%<br>(2.3-3.4)    | n/a                    |
| Low income<br>N=40,753                   | 9.1%<br>(8.2-10.1)    | n/a                    | 4.5%<br>(3.5-5.9)    | n/a                    |

Note: \*\*\* p&lt;0.001.

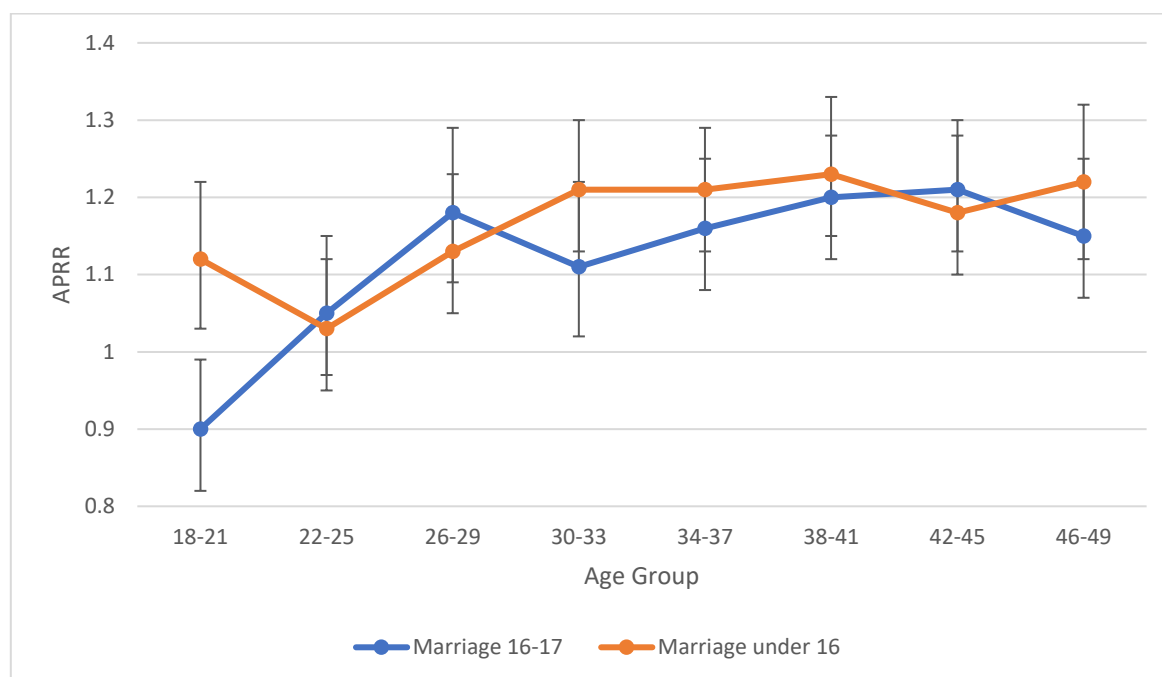

**Supplementary Figure S1.** Prevalence rate ratios with 95% CIs (adjusted for within age group variation in age) for women with less severe disabilities having been exposed to child marriage at age 16-17 and under 16 by age group.

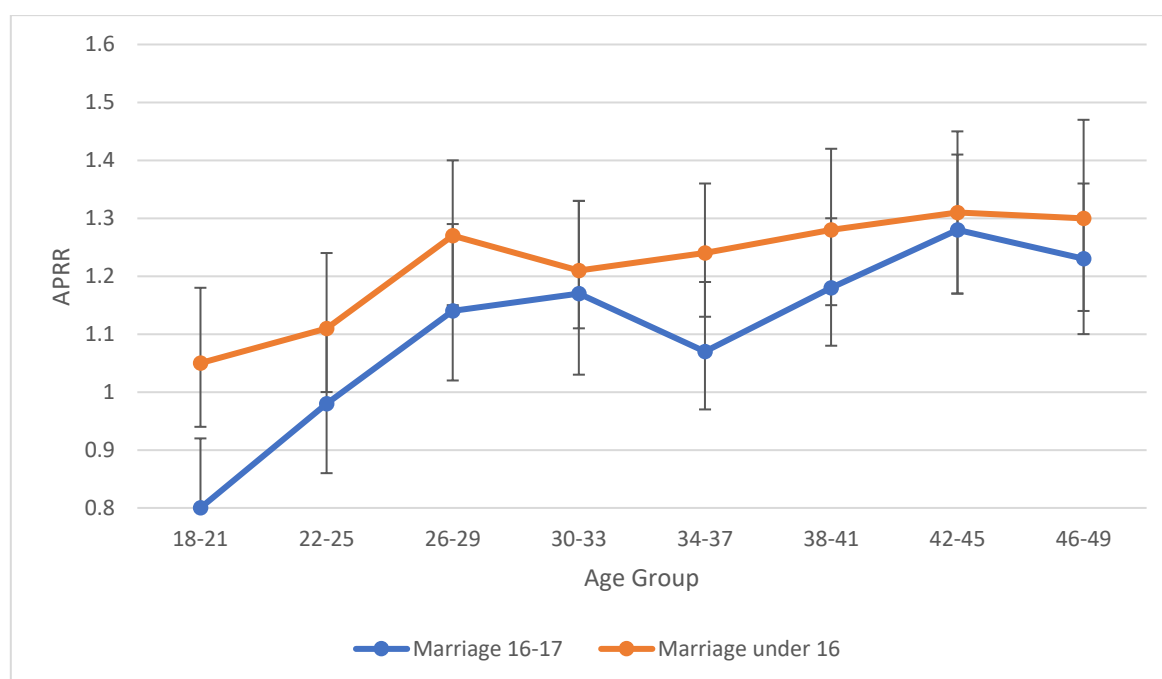

**Supplementary Figure S2.** Prevalence rate ratios with 95% CIs (adjusted for within age group variation in age) for women with more severe disabilities having been exposed to child marriage at age 16-17 and under 16 by age group.

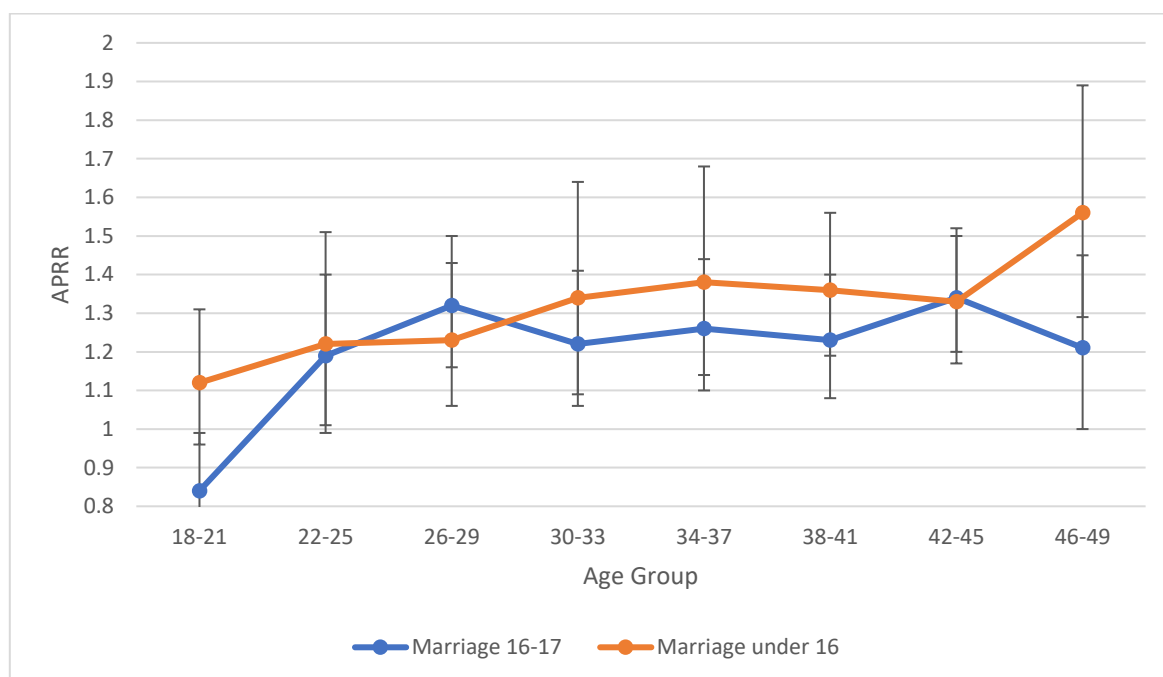

**Supplementary Figure S3.** Prevalence rate ratios with 95% CIs (adjusted for within age group variation in age) for women with disabilities in Upper-Middle Income countries having been exposed to child marriage at age 16-17 and under 16 by age group.

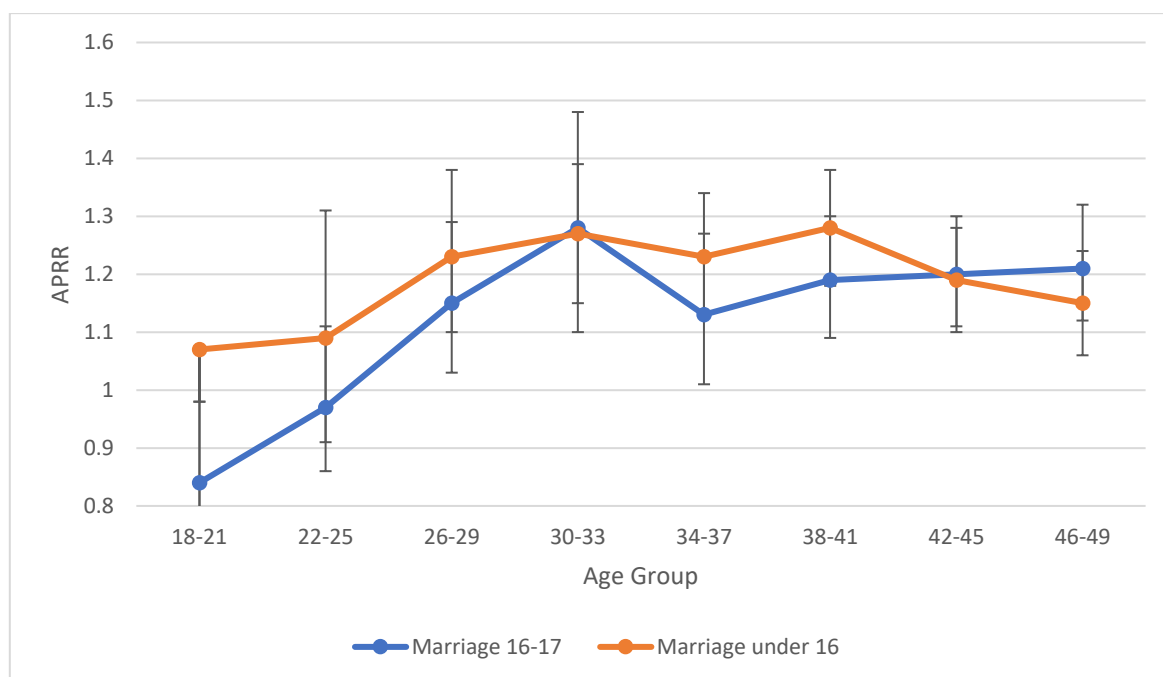

**Supplementary Figure S4.** Prevalence rate ratios with 95% CIs (adjusted for within age group variation in age) for women with disabilities in Lower-Middle Income countries having been exposed to child marriage at age 16-17 and under 16 by age group.

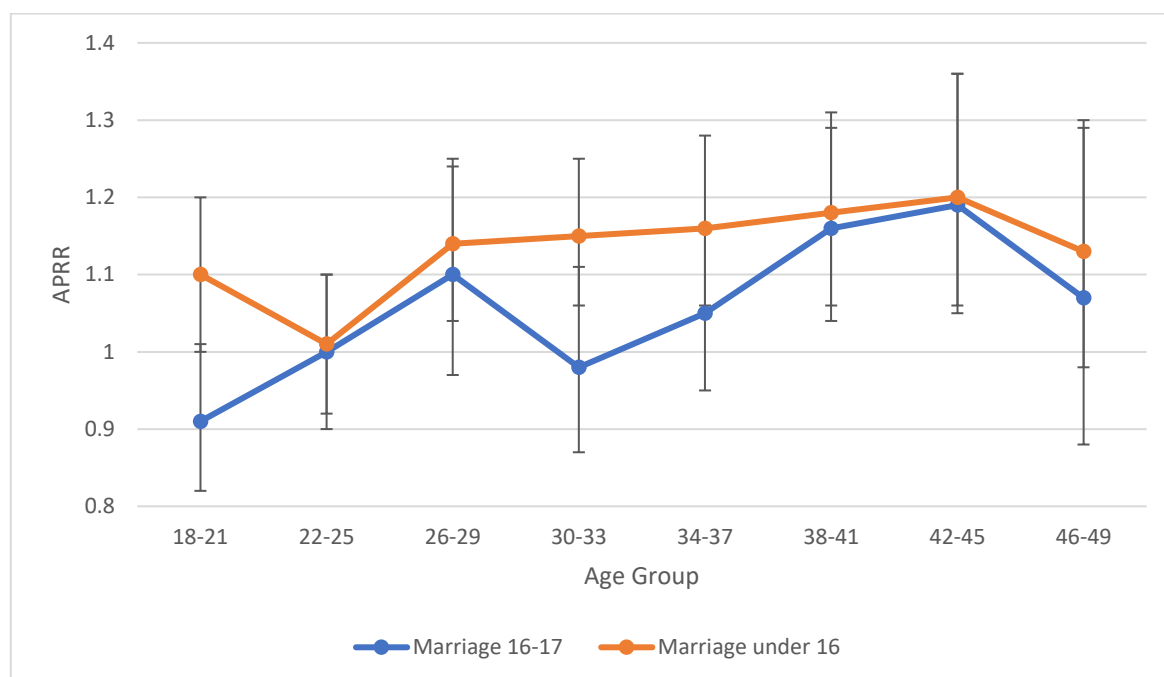

**Supplementary Figure S5.** Prevalence rate ratios with 95% CIs (adjusted for within age group variation in age) for women with disabilities in Low Income countries having been exposed to child marriage at age 16-17 and under 16 by age group.
